# Supplementary material for: Immortalization of American miniature horse-derived fibroblast by cell cycle regulator with normal karyotype
Source: PeerJ journal article supplement (doi:10.7717/peerj.16832), 2024-01-26

miniature horse #1

miniature horse #2

Primary

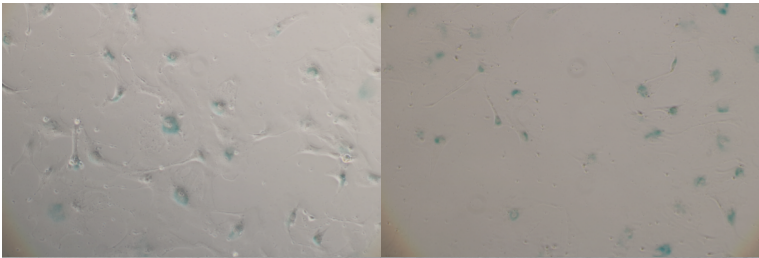

K4D

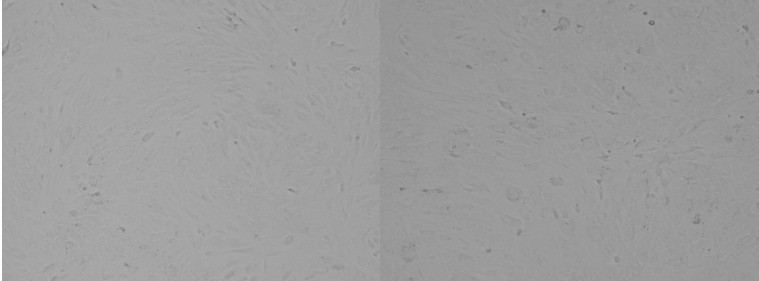

K4DT

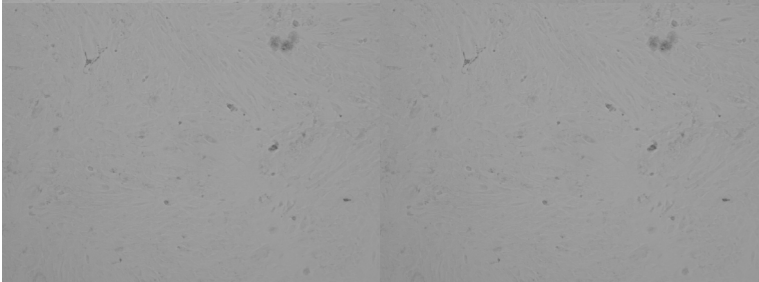

SV40T

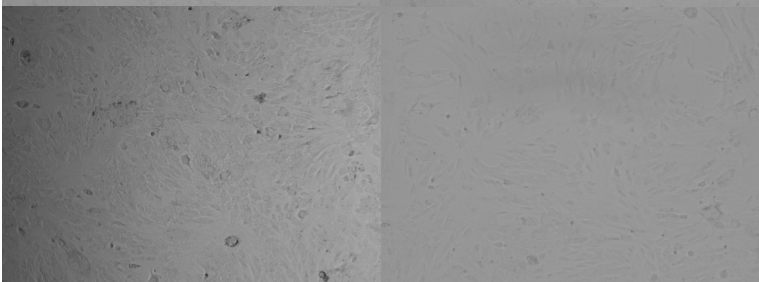

TERT

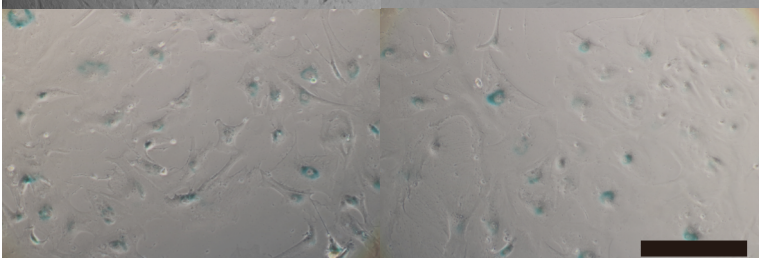

Supplement: Fig3S_SA-b-Gal_assay.pdf [file Fig3S_SA-b-Gal_assay.pdf]
